# Supplementary material
Source: MDPI journal article supplement (https://www.mdpi.com/2220-9964/12/5/190)
Supplement: s1 [file s1]

## Supplementary Materials

**Table S1.** ANCOVAS results for each land use classes. Df is degrees of freedom.

|             |             | Df | Sum of Squares | Mean of Squares | Fisher's F | p-value |
|-------------|-------------|----|----------------|-----------------|------------|---------|
| Agriculture | Years       | 1  | 0.00           | 0.00            | 0.57       | 0.49    |
|             | Region      | 1  | 0.00           | 0.00            | 0.80       | 0.42    |
|             | Interaction | 1  | 0.01           | 0.01            | 1.76       | 0.26    |
|             | Residuals   | 4  | 0.02           | 0.00            |            |         |
| Forest      | Years       | 1  | 91.53          | 91.53           | 76.25      | > 0.001 |
|             | Region      | 1  | 185.62         | 185.62          | 154.62     | > 0.001 |
|             | Interaction | 1  | 91.10          | 91.10           | 75.89      | > 0.001 |
|             | Residuals   | 4  | 4.80           | 1.20            |            |         |
| Grassland   | Years       | 1  | 0.06           | 0.06            | 0.75       | 0.44    |
|             | Region      | 1  | 0.04           | 0.04            | 0.48       | 0.53    |
|             | Interaction | 1  | 0.00           | 0.00            | 0.02       | 0.88    |
|             | Residuals   | 4  | 0.33           | 0.08            |            |         |
| Pasture     | Years       | 1  | 107.04         | 107.04          | 58.96      | > 0.01  |
|             | Region      | 1  | 164.73         | 164.73          | 90.74      | > 0.001 |
|             | Interaction | 1  | 100.89         | 100.89          | 55.57      | > 0.01  |
|             | Residuals   | 4  | 7.26           | 1.82            |            |         |
| Savannah    | Years       | 1  | 0.03           | 0.03            | 0.42       | 0.55    |
|             | Region      | 1  | 0.20           | 0.20            | 2.93       | 0.16    |
|             | Interaction | 1  | 0.05           | 0.05            | 0.69       | 0.45    |
|             | Residuals   | 4  | 0.27           | 0.07            |            |         |
| Urban       | Years       | 1  | 0.00           | 0.00            | 0.66       | 0.46    |
|             | Region      | 1  | 0.00           | 0.00            | 0.01       | 0.95    |
|             | Interaction | 1  | 0.00           | 0.00            | 1.82       | 0.25    |
|             | Residuals   | 4  | 0.00           | 0.00            |            |         |
